# Supplementary material
Source: Elsevier journal article supplement (https://www.sciencedirect.com/science/article/pii/S2605153220300285)

## Kyphoplasty-related paradoxical cerebral arterial embolism. Case presentation and topic review

### Supplementary data

**Video 1 of the supplementary data.** Transthoracic echocardiogram; subcostal view. Restrictive atrial septal defect with a visible bidirectional shunt. The right-to-left shunt is predominant.

**Video 2 of the supplementary data.** Transoesophageal echocardiogram where atrial septal defect is not evident by colour-Doppler technique.

**Video 3 of the supplementary data.** Transoesophageal echocardiogram. Patent foramen ovale is visible by means of agitated saline test. Microbubbles are seen passing through the foramen ovale from right atrium to the left atrium.

**Figure 1 of the supplementary data.** Chest radiograph. Orthopaedic cement is observed in the right lung (arrowheads).

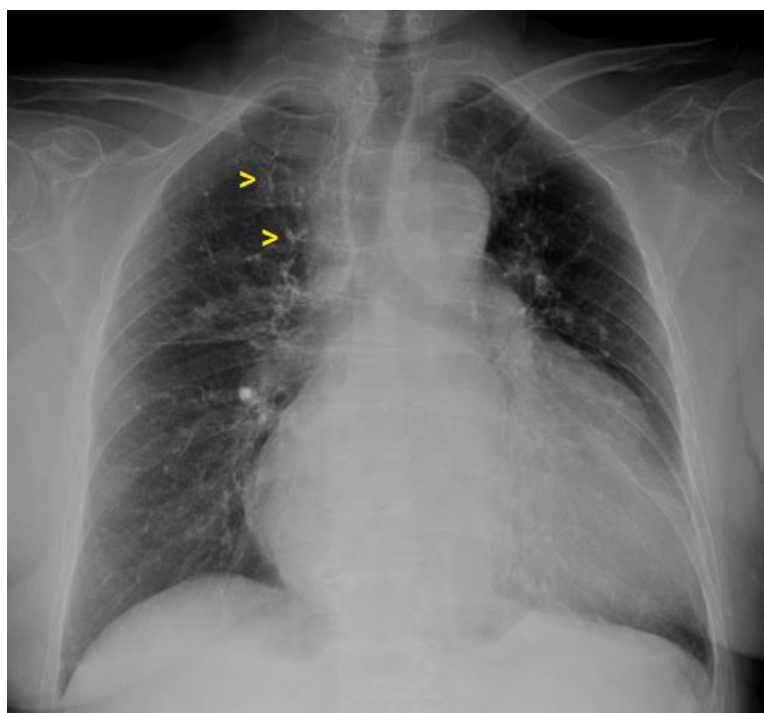

Supplement: mmc1 [file S2605153220300285:mmc1.pdf]
